# Supplementary figures and images for: Using a Culturally Tailored Narrative to Increase Cervical Cancer Detection Among Spanish-Speaking Mexican-American Women
Source: Springer Nature journal article supplement (doi:10.1007/s13187-019-01521-6), 2019-04-24

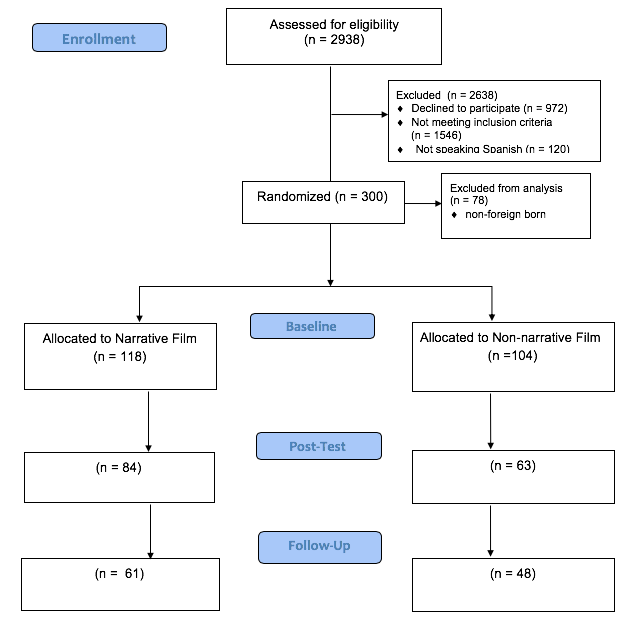

Supplement: MOESM1 [file 16674076]
